# Supplementary material
Source: MDPI journal article supplement (https://www.mdpi.com/2073-4395/11/10/1988)
Supplement: s1 [file s1]

**Table S2.** Comparison of pollen size among the normal or giant pollens in diploid and autotetraploid Meiwa kumquat. Different letters denote significant differences at  $P < 0.05$  by Tukey's multiple comparison test ( $n = 10$ ).

| Strain                       | Ploidy level | Type of pollen | Size of pollen ( $\mu\text{m}$ ) |
|------------------------------|--------------|----------------|----------------------------------|
| Meiwa kumquat                | 2x           | normal         | 23.3 b                           |
|                              |              | giant          | 27.3 a                           |
| Autotetraploid Meiwa kumquat | 4x           | normal         | 27.0 a                           |
