# Supplementary material
Source: MDPI journal article supplement (https://www.mdpi.com/2073-4395/11/10/1988)
Supplement: s1 [file s1]

**Table S1.** Information on SSR markers used in this study with their GenBank accession numbers, linkage groups, primer sequences, repeat motifs, bibliographic references, and optimal annealing temperatures.

| Locus    | GenBank<br>accession No. | Linkage<br>group | Primer sequece            |                          | Repeat motif                                | Bibliographic<br>reference | Optimal annealing<br>temperature (°C) |
|----------|--------------------------|------------------|---------------------------|--------------------------|---------------------------------------------|----------------------------|---------------------------------------|
|          |                          |                  | Forward (5' - 3')         | Reverse (5' - 3')        |                                             |                            |                                       |
| NSX175   | -                        | 1                | GAGCTTACTAATAGGATACGCTG   | ATTGTAAGGCGAATTGGATGG    | (AAGA) <sub>n</sub> (AAT) <sub>n</sub>      | Shimizu et al. (2016)      | 60.6                                  |
| GSR2101  | -                        | 1                | AAATGAATTGTAAATAACGGAGAT  | GAGATTCTATAATTGAAAGCTCTC | (TA) <sub>n</sub> (GA) <sub>n</sub>         | Shimizu et al. (2016)      | 54.0                                  |
| TSGR265  | -                        | 2                | AACAGTCCGACTAATTCATCC     | TATCTCCAAGACTCCAACCT     | (TA[GCA]) <sub>n</sub> (CAA) <sub>n</sub>   | Shimizu et al. (2016)      | 60.6                                  |
| CiBE1644 | ET097780                 | 3                | ACAGAAGAGGAGCCATTATTT     | CAGAGAGAACCCGAAGAAG      | (GTT) <sub>11</sub>                         | Ollitrault et al. (2010)   | 58.0                                  |
| NSX02    | -                        | 3                | ACATCACATCGCCAATACCC      | ACTCGTGGGACTCATGACTC     | (TA) <sub>n</sub> (CA) <sub>n</sub>         | Shimizu et al. (2016)      | 59.0                                  |
| TSR8EM24 | -                        | 3                | CCTTAATCGGAACAAATCATCGG   | AAGACACAGCCAGATCTTCC     | (CAT) <sub>n</sub>                          | Shimizu et al. (2016)      | 56.0                                  |
| TSRA110  | -                        | 4                | GTTACACTGTCAAAGCCACTG     | CGTGACAAATCTCCGACTCC     | (CTTTTT) <sub>n</sub>                       | Shimizu et al. (2016)      | 56.0                                  |
| CiBE4796 | ET110437                 | 5                | GATGAGAACGCTGATGCT        | TTCAACCACACTGACGATAA     | (AG) <sub>10</sub>                          | Ollitrault et al. (2010)   | 60.0                                  |
| NSX43    | -                        | 5                | TTCTGGATCAAAGCTTCGT       | AACITTAACCTACAATCAGCC    | (TTCATGA) <sub>n</sub>                      | Shimizu et al. (2016)      | 60.0                                  |
| GSR10S17 | -                        | 5                | GTCAATGCTATGTTATCACAC     | TTTTATTGTGACGTGGAACG     | (ATTATC) <sub>n</sub>                       | Shimizu et al. (2016)      | 54.0                                  |
| SSR08B62 | -                        | 5                | TGACTCAAGTGATGAAGAGG      | ACTGCTTGGTCTTTGGCT       | (AAAGTG) <sub>n</sub> (AAGATG) <sub>n</sub> | Shimizu et al. (2016)      | 56.0                                  |
| NSX169   | -                        | 5                | GACACGTAGCTCTATCTATATCTTC | GCTGCTGTTGATTGACACAT     | (AAG) <sub>n</sub>                          | Shimizu et al. (2016)      | 56.0                                  |
| GSR5114  | -                        | 5                | TAGTAACGGTGAGTGAAAAAG     | AACCTGTGAAAGTTAATGTGG    | (AACAC) <sub>n</sub>                        | Shimizu et al. (2016)      | 56.0                                  |
| CiBE0447 | ET091388                 | 6                | CACAAAGAGAGTAACCCACAA     | CGTCAAGAAGAGAGAATGATG    | (TTC) <sub>14</sub>                         | Ollitrault et al. (2010)   | 54.8                                  |
| CiBE2165 | ET102021                 | 7                | AATCCACTCTCAAAACACCAG     | AACTGCCAAATAACTACCATTC   | (TG) <sub>9</sub>                           | Ollitrault et al. (2010)   | 56.0                                  |
| CiBE2227 | ET100673                 | 8                | AGAACCAAGTCACCTCACAG      | AGAGAAGGATAGGGATGGAA     | (AAC) <sub>7</sub>                          | Ollitrault et al. (2010)   | 59.0                                  |
| GSR3141  | -                        | 8                | GGGATATACTCGATTAAGTAGAC   | AATAGTAGGGATTCAGATTAC    | (ATT) <sub>n</sub>                          | Shimizu et al. (2016)      | 54.0                                  |
| NSX141   | -                        | 9                | TTAAGCCAATTCCTGAGCCT      | TGGTCTGATGGATTCTGATTGT   | (AAC) <sub>n</sub> (AAT) <sub>n</sub>       | Shimizu et al. (2016)      | 56.0                                  |
