# Supplementary material
Source: MDPI journal article supplement (https://www.mdpi.com/2073-4395/11/10/1988)
Supplement: s1 [file s1]

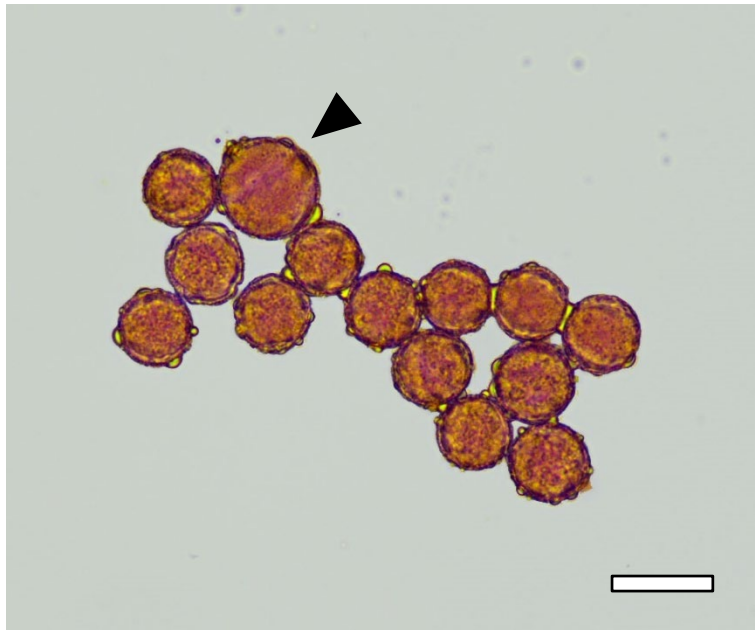

**Figure S1.** Appearance of the giant pollen in the acetocarmine-stained pollens of *Meiwa kumquat*. Arrowhead indicates the giant pollen. Bar = 30  $\mu\text{m}$ .
